# Supplementary figures and images for: Adipocytes fail to maintain cellular identity during obesity due to reduced PPARγ activity and elevated TGFβ-SMAD signaling
Source: PubMed Central journal article supplement — Mol Metab. 2020 Sep 28;42:101086. doi: 10.1016/j.molmet.2020.101086 (PMC7559520; doi:10.1016/j.molmet.2020.101086), 2020-09-28

**Figure S1**

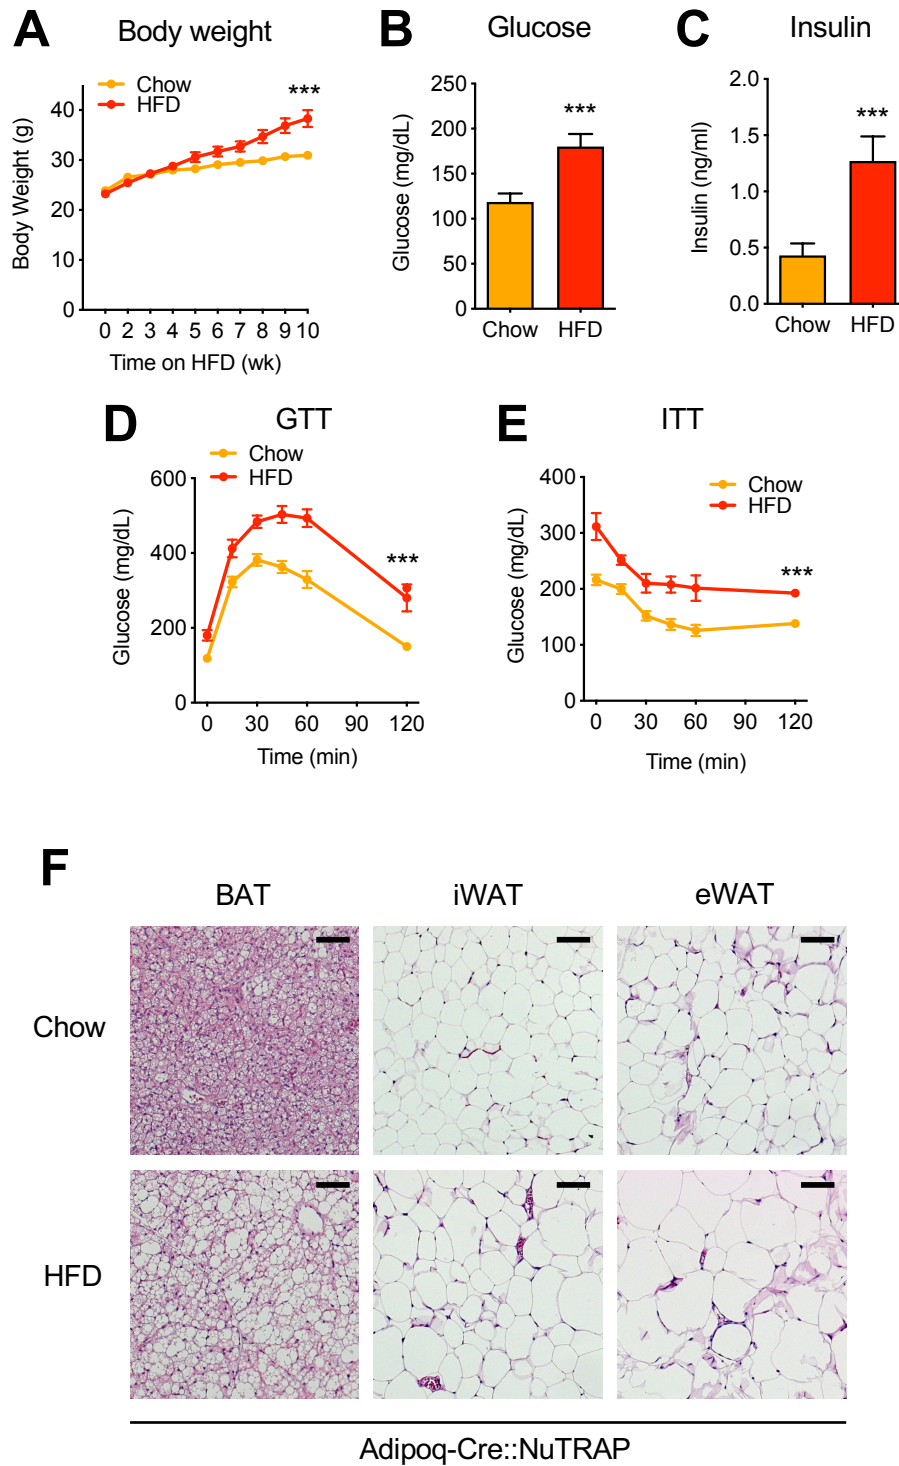

**Figure S2**

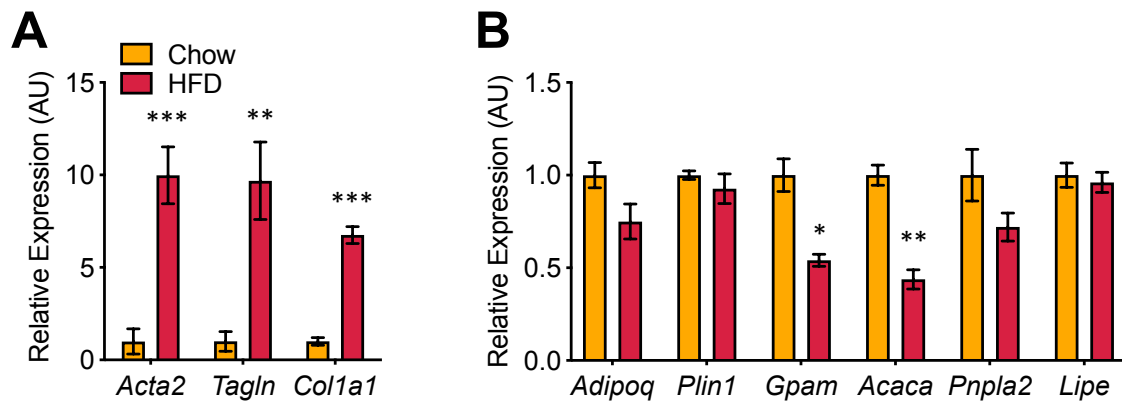

Adipoq-CreERT::NuTRAP

**Figure S3**

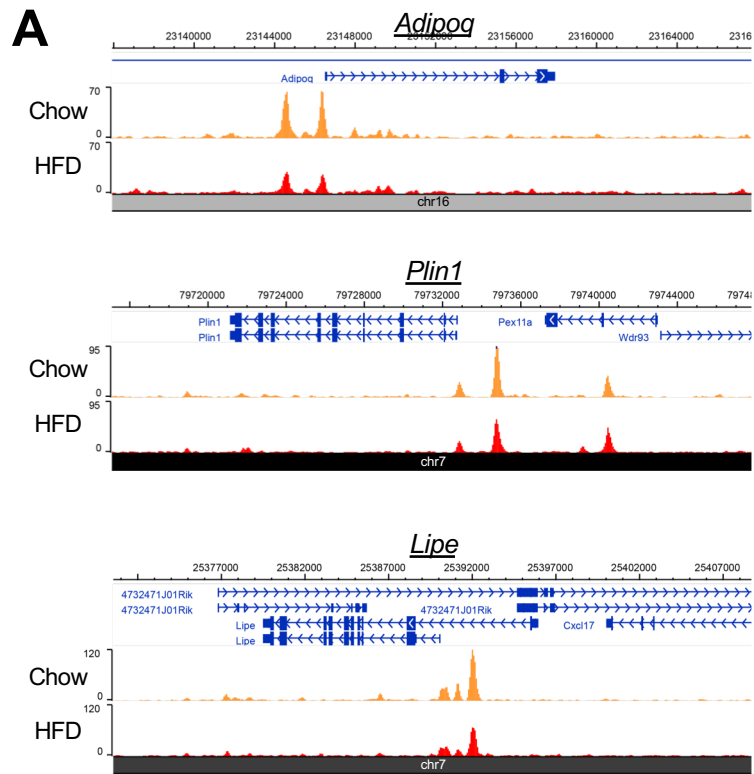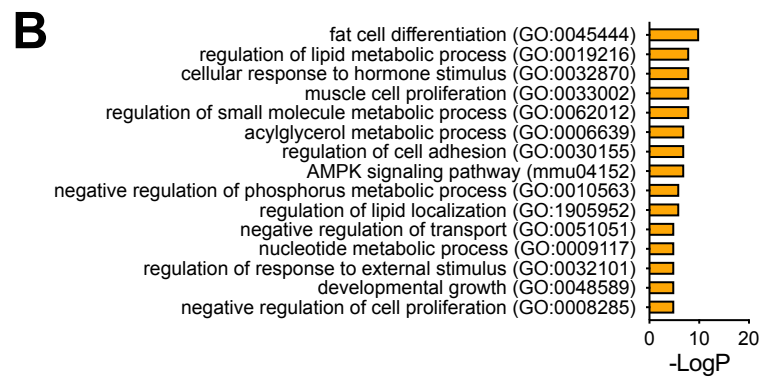

**Figure S4**

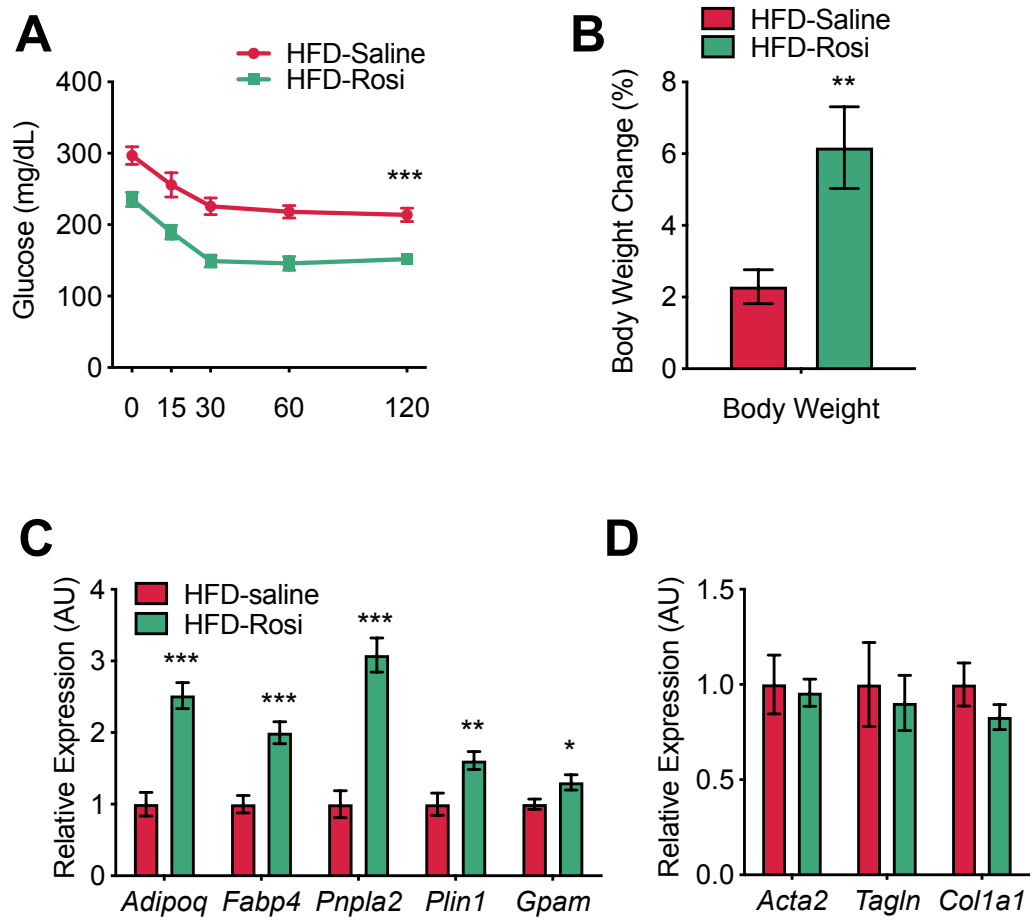

Figure S5

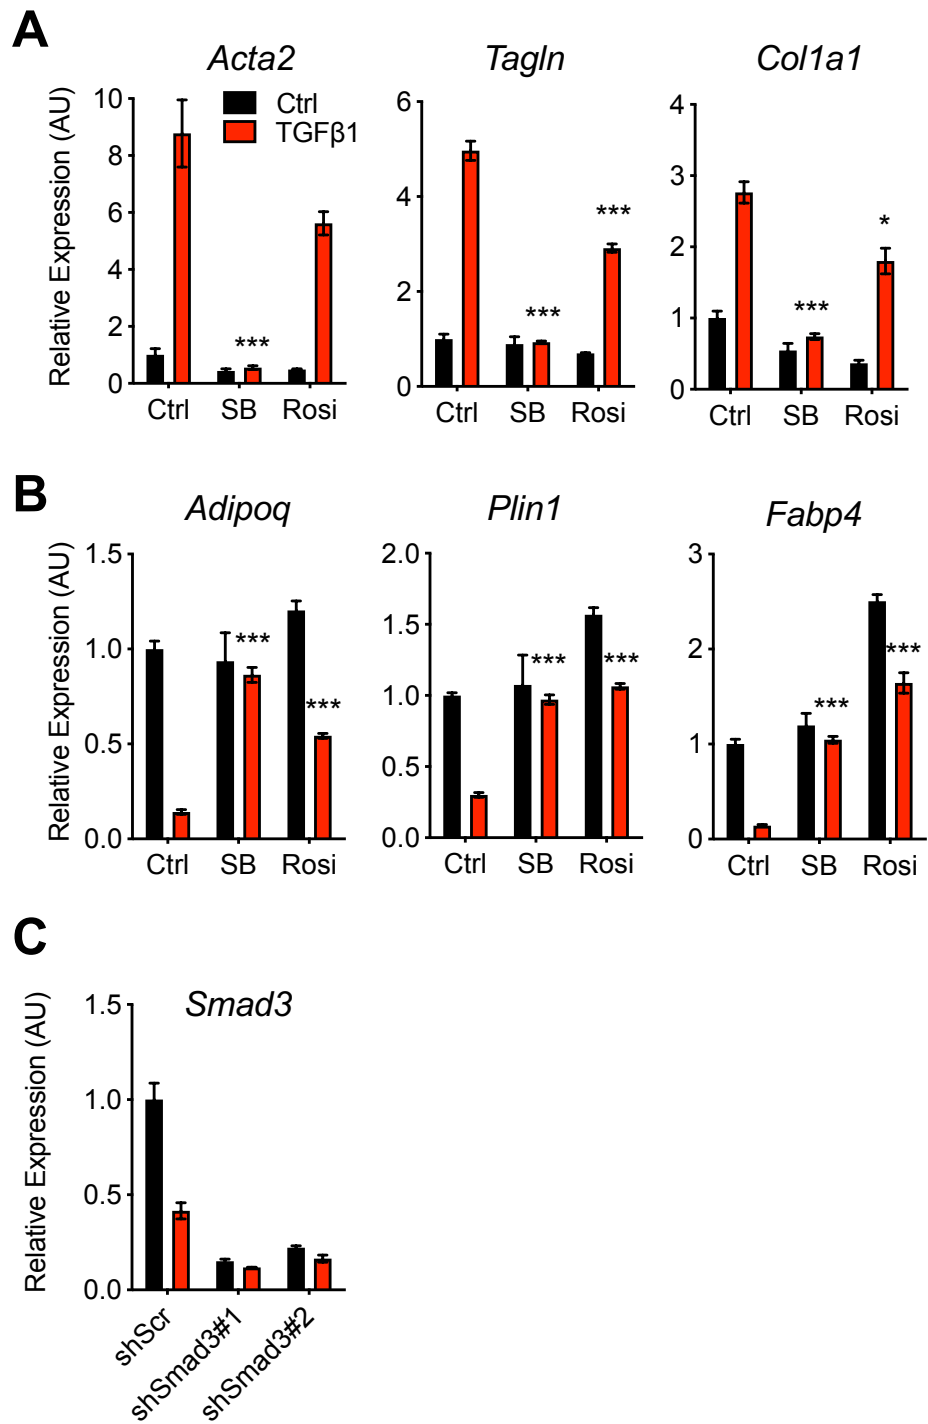

Supplement: mmc2.pdf [file mmc2.pdf]
